# Supplementary material
Source: PubMed Central journal article supplement (PMC3274627)
Supplement: NIHMS338854-supplement-1.pdf [file NIHMS338854-supplement-1.pdf]

**a**

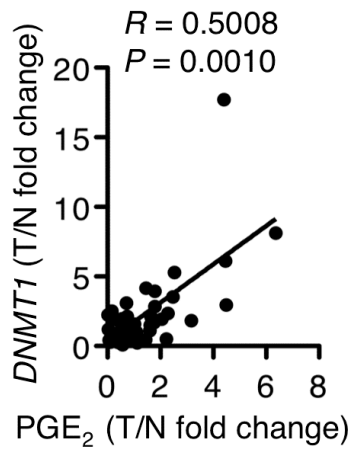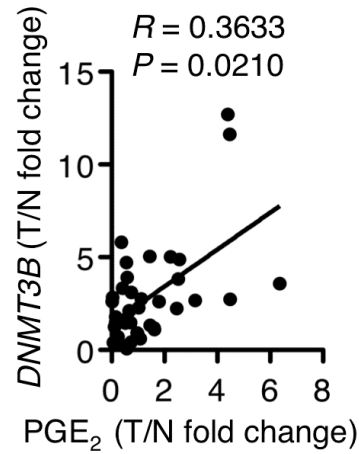

**b**

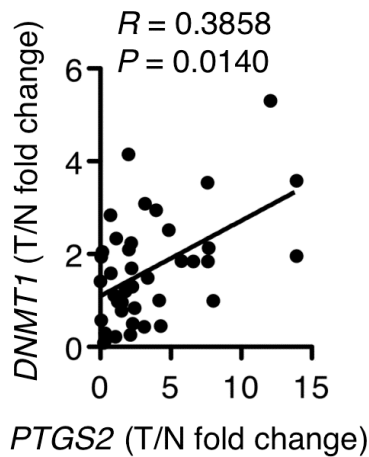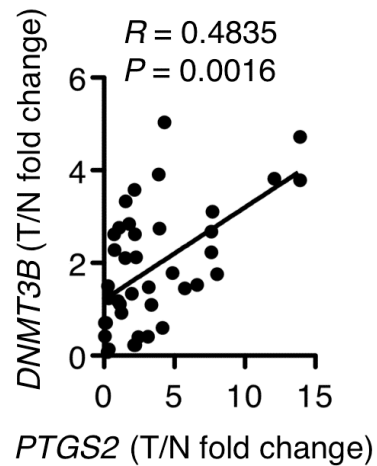

**Supplementary Figure 1** The correlation between levels of PTGS2, PGE<sub>2</sub>, DNMT1, and DNMT3B in human CRC. **(a,b)** The levels of PGE<sub>2</sub> **(a)** and PTGS2 (COX-2) mRNA **(b)** are correlated with the expression of DNMT1 and DNMT3B at mRNA levels in 40 pairs of human colorectal carcinomas (T) with matched normal tissues (N). Data were presented as fold changes in cancer specimens as compared to matched normal tissues. Nonparametric Spearman correlation analysis ( $R$  value) was performed.

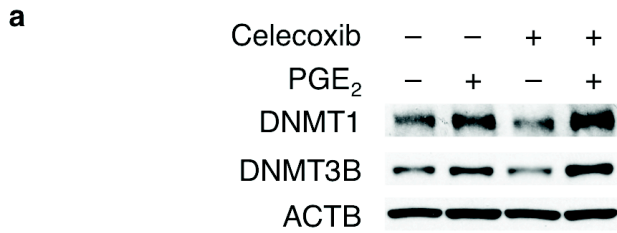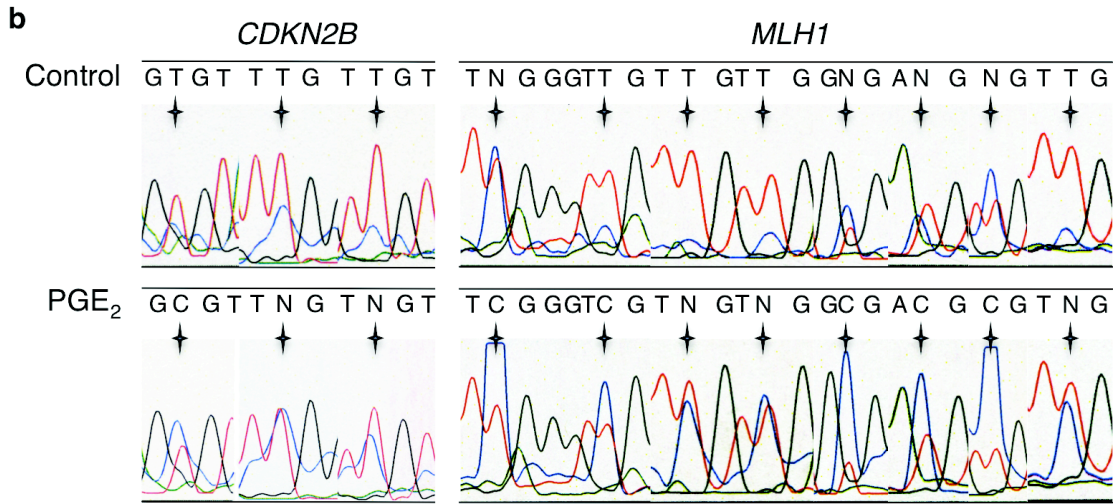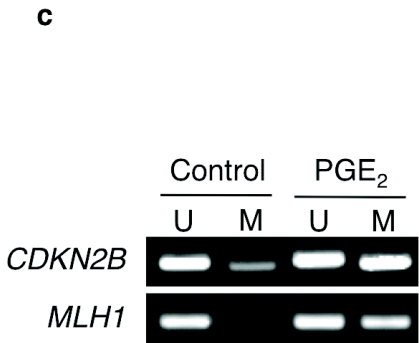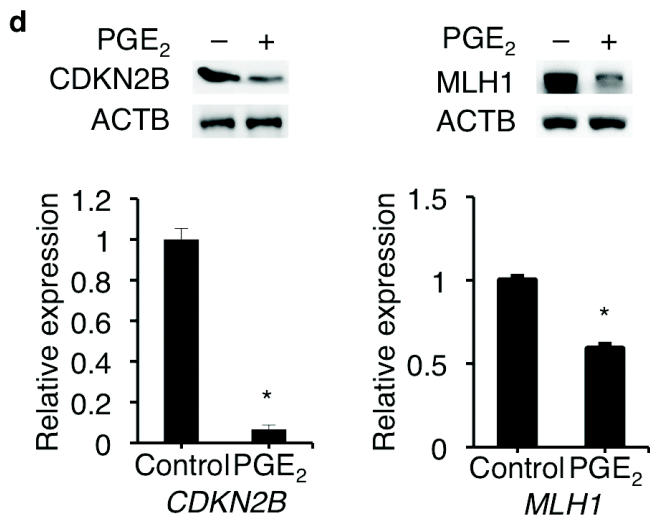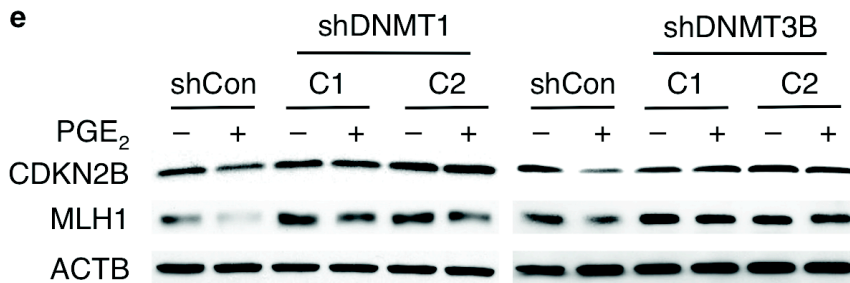

**Supplementary Figure 2** PGE<sub>2</sub> silences *CDKN2B* (*p15*) and *MLH1* genes by enhancing the promoter CGI methylation of these genes in human CRC cell lines. (a) PGE<sub>2</sub> attenuated the effect of celecoxib on downregulating DNMT1 and DNMT3B protein expression in HT-29 cells. (b) PGE<sub>2</sub> increased the promoter CGI methylation of *CDKN2B* (*p15*) and *MLH1* in LS-174T cells. For *CDKN2B* (*p15*) promoter, a region (–3 to +247) that contains 27 CpGs was examined. Three representative CpGs were presented. For the *MLH1* promoter, a region (–401 to –113) that contains 19 CpGs was examined. Eight representative CpGs were presented. (c) PGE<sub>2</sub>-enhanced CGI methylation of *CDKN2B* (*p15*) and *MLH1* in LS-174T cells was measured by methylation-specific PCR (MSP). U: unmethylated PCR products with primers targeting unmethylated template sequences. M: methylated PCR products with primers targeting methylated template sequences. (d) PGE<sub>2</sub> decreased the expression of CNR1 (CB1) and MGMT at both protein and mRNA levels. The levels of protein (upper panels) and mRNA (lower panels) were examined as described in **Fig. 1c**. (e) Knockdown of *DNMT1* or *DNMT3B* attenuated PGE<sub>2</sub>-induced downregulation of *CDKN2B* (*p15*) and *MLH1* in LS-174T cells. *CDKN2B* (*p15*) and *MLH1* protein expression was examined as described in **Fig. 1e**.

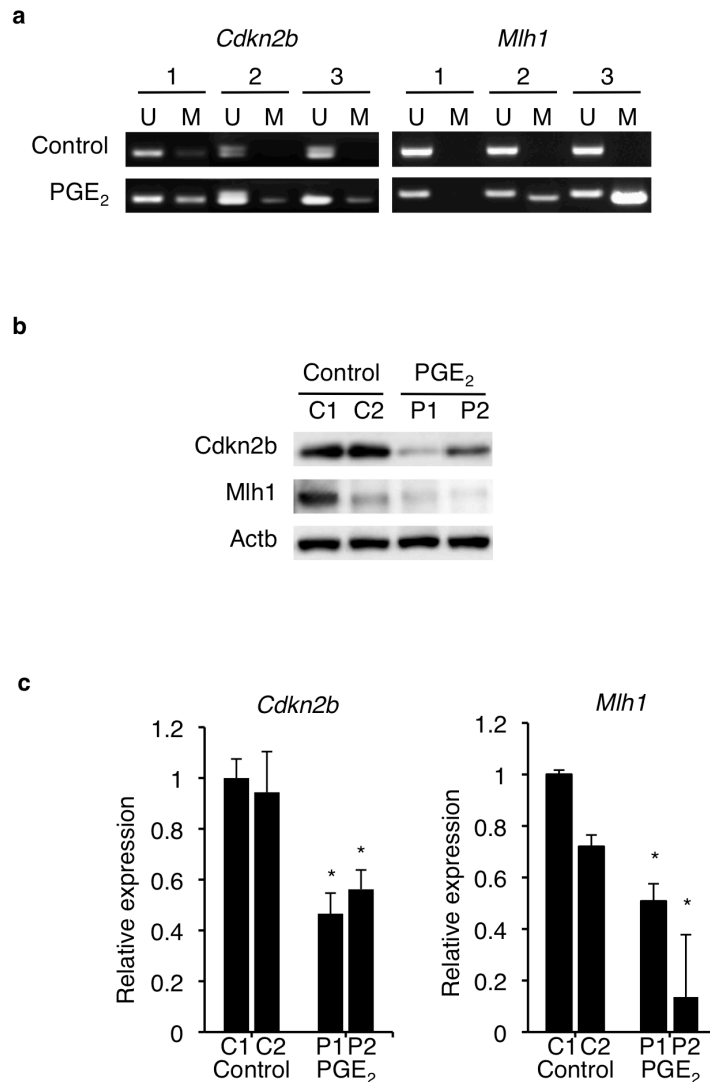

**Supplementary Figure 3** PGE<sub>2</sub> promotes intestinal tumor growth via upregulating CGI methylation in *Apc*<sup>Min/+</sup> mice. (a) PGE<sub>2</sub> treatment increased the promoter CGI methylation of *Cdkn2b* (*p15*) and *Mlh1* in the colonic tumor epithelial cells isolated from a cohort of three male *Apc*<sup>Min/+</sup> mice for each group. The CGI methylation of *Cdkn2b* (*p15*) and *Mlh1* was examined by MSP as described in **Supplementary Fig. 2c**. (b,c) Treatment of *Apc*<sup>Min/+</sup> mice with PGE<sub>2</sub> decreased *Cdkn2b* (*p15*) and *Mlh1* expression in colonic tumor epithelial cells. The *Cdkn2b* (*p15*) and *Mlh1* expression at protein levels (b) and mRNA levels (c) from a cohort of two male mice for each group (C1 and C2 represent mouse treated with vehicle, P1 and P2 represent mouse treated with PGE<sub>2</sub>) were examined. Error bars indicate s.d. \* *P* < 0.05 (two-tailed unpaired Student's *t* test).

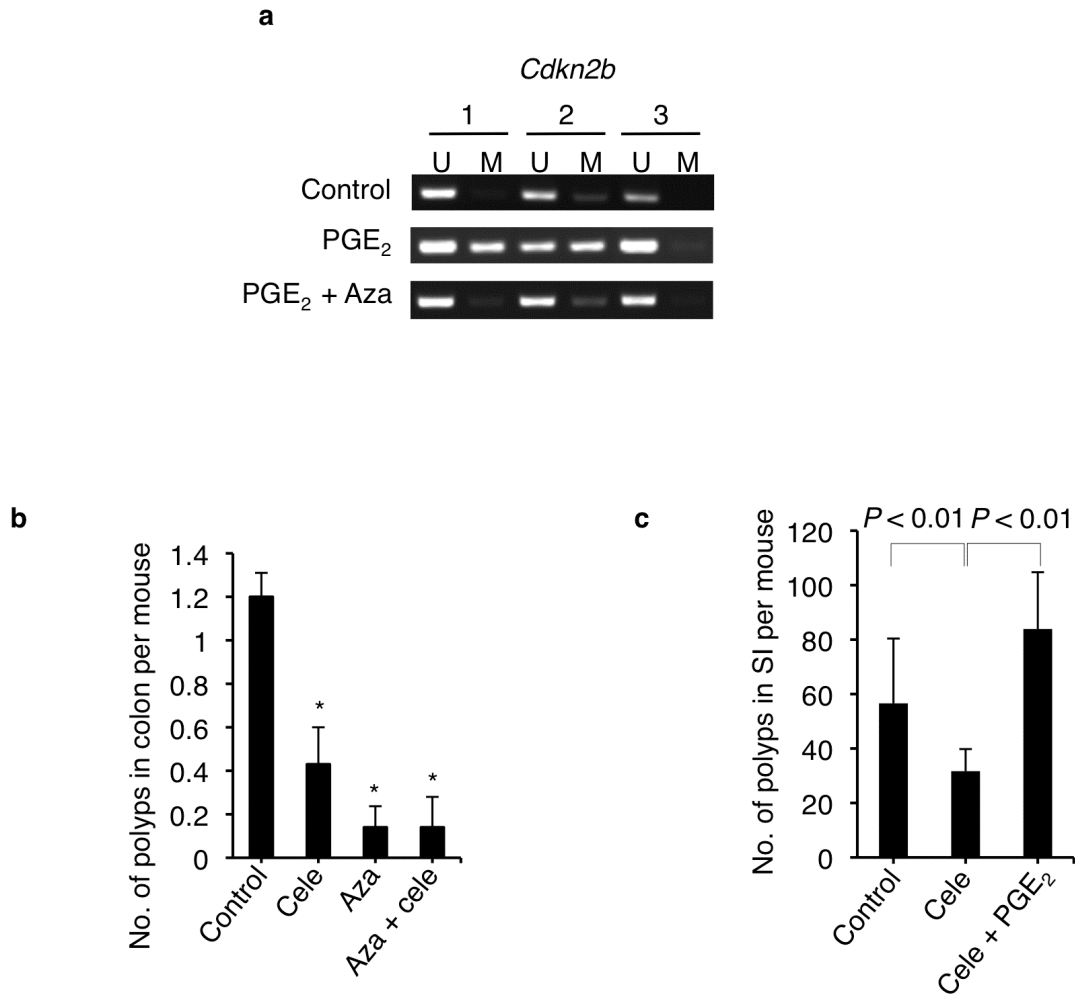

**Supplementary Figure 4** The effects of a demethylating agent and celecoxib on PGE<sub>2</sub>-enhanced CGI methylation and intestinal tumor growth. **(a)** Treatment of *Apc*<sup>Min/+</sup> mice with 5-Aza-dC attenuated PGE<sub>2</sub>-enhanced CGI methylation of *Cdkn2b* (*p15*). The levels of CGI methylation of *Cdkn2b* (*p15*) in the colonic tumor epithelial cells isolated from a cohort of three male mice for each group were examined by MSP as mentioned in **Supplementary Fig. 2c**. **(b)** Combination treatment with celecoxib and 5-Aza-dC more efficiently inhibited colon tumor growth in *Apc*<sup>Min/+</sup> mice as described in **Fig. 2g**. Error bars indicate  $\pm$  s.e.m. ( $n = 12, 14, 14,$  and  $7,$  respectively). \*  $P < 0.05$  (Wilcoxon Rank Sum test). **(c)** PGE<sub>2</sub> reversed the effect of celecoxib on inhibiting tumor growth. Error bars indicate s.e.m. ( $n = 15$  for each group. Wilcoxon Rank Sum test).

a

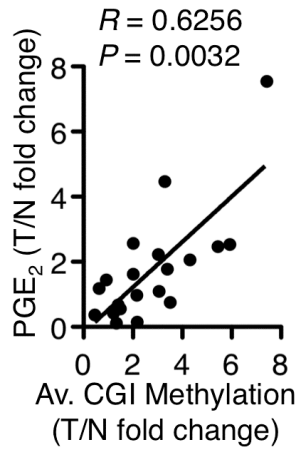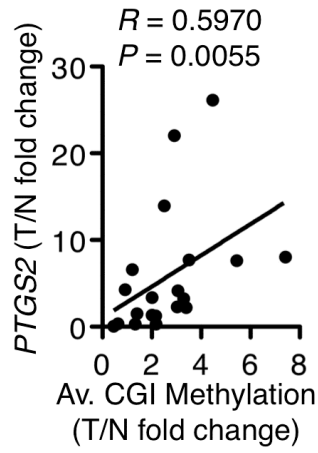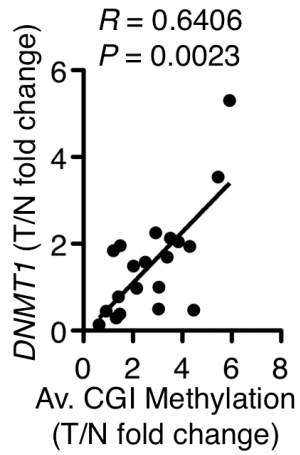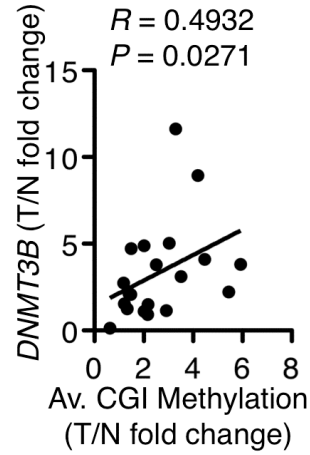

b

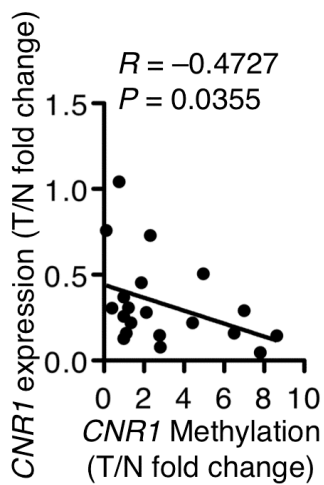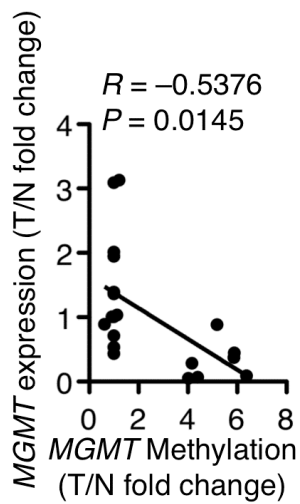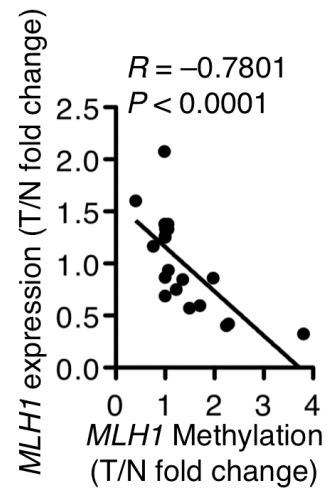

**Supplementary Figure 5** Correlation analysis between the levels of PGE<sub>2</sub>, *PTGS2* (COX-2), *DNMT1*, *DNMT3B*, CGI methylation of target genes, and their expression. **(a)** The levels of PGE<sub>2</sub> and *PTGS2* (COX-2) expression were correlated with the CGI methylation in paired human tumor/normal tissues. The promoter CGI methylation of *CNR1*, *MGMT*, and *MLH1* were measured by bisulfite PCR sequencing. The average (Av.) of CGI methylation was the averaged CGI methylation of *CNR1*, *MGMT*, and *MLH1*. Data were presented as fold changes of tumor tissues as compared to matched normal tissues. Nonparametric Spearman correlation analysis (*R* value) was performed (*n* = 20). **(b)** Target gene expression reversely correlated with its CGI methylation. The expression of *CNR1*, *MGMT*, and *MLH1* was measured using Q-PCR. Data were presented as fold changes of tumor tissues as compared to matched normal tissues. Nonparametric Spearman correlation analysis (*R* value) was performed (*n* = 20) between the expression and CGI methylation of each target gene.

**Supplementary Table**

**Table 1** Correlation of PGE<sub>2</sub>, *PTGS2* (*COX-2*), *DNMT1*, *DNMT3B*, *CNR1*, *MGMT*, and *MLH1* with CGI methylation status in paired human tumor (T) and normal (N) tissues (Spearman *R* value and *P* value, *n* = 20). \* indicates *P* < 0.05.

| Methylation (T/N fold change) | Level/expression (T/N fold change) | <i>R</i> | <i>P</i> |
|-------------------------------|------------------------------------|----------|----------|
| <i>CNR1</i>                   | PGE <sub>2</sub>                   | 0.5668   | 0.0092*  |
|                               | <i>PTGS2</i> ( <i>COX-2</i> )      | 0.6030   | 0.0049*  |
|                               | <i>DNMT1</i>                       | 0.5740   | 0.0042*  |
|                               | <i>DNMT3B</i>                      | 0.4619   | 0.0403*  |
| <i>MGMT</i>                   | PGE <sub>2</sub>                   | 0.4096   | 0.0377*  |
|                               | <i>PTGS2</i> ( <i>COX-2</i> )      | 0.4682   | 0.0159*  |
|                               | <i>DNMT1</i>                       | 0.4982   | 0.0155*  |
|                               | <i>DNMT3B</i>                      | 0.4998   | 0.0248*  |
| <i>MLH1</i>                   | PGE <sub>2</sub>                   | 0.3734   | 0.1049   |
|                               | <i>PTGS2</i> ( <i>COX-2</i> )      | 0.6230   | 0.0033*  |
|                               | <i>DNMT1</i>                       | 0.4402   | 0.0521   |
|                               | <i>DNMT3B</i>                      | 0.5182   | 0.0192*  |



**Table 2** Primers used (U: unmethylated DNA; M: methylated DNA)

|                                         | Forward primers                 | Reverse primers                     | Ref.                                |    |
|-----------------------------------------|---------------------------------|-------------------------------------|-------------------------------------|----|
| <b>Q-PCR primers</b>                    |                                 |                                     |                                     |    |
| <i>ACTB</i>                             | 5'-AGAAAATCTGGCACCACACC-3'      | 5'-AGAGGCGTACAGGGATAGCA-3'          |                                     |    |
| <i>CDKN2B</i>                           | 5'-AGGGATATTTAGGAGTGTGTGAC-3'   | 5'-CCATCGGAAGATTCGTAGCC-3'          |                                     |    |
| <i>CNR1</i>                             | 5'-CGCAGGTCCTTACTCCTCAG-3'      | 5'-AGGACCTGGTCCTGATCCT-3'           |                                     |    |
| <i>DNMT1</i>                            | 5'-GAACCAACACCCAAACAG-3'        | 5'-TTCTCGTCTCCATCTTCG-3'            |                                     |    |
| <i>DNMT3B</i>                           | 5'-TAACAACGGCAAAGACCGAGGG-3'    | 5'-TCCTGCCACAAGACAAACAGCC-3'        |                                     |    |
| <i>MGMT</i>                             | 5'-CTTACCATCCCGTTTTCC-3'        | 5'-TGCCTCTCATTGCTCCTC-3'            |                                     |    |
| <i>MLH1</i>                             | 5'-CAGAATGTGGATGTTAATGTG-3'     | 5'-AGTCCTGGTAGCAAAGTC-3'            |                                     |    |
| <i>PTGS2</i>                            | 5'-CCCTTGGGTGTCAAAGGTAA-3'      | 5'-GCCCTCGCTTATGATCTGTC-3'          |                                     |    |
| <i>Cdkn2b</i>                           | 5'-GTGACATTGCGAGGTATC-3'        | 5'-GTAGGAAGTTATTTCTGATTGG-3'        |                                     |    |
| <i>Cnr1</i>                             | 5'-CTGGTTCTGATCCTGGTGGT-3'      | 5'-TGTCTCAGGTCCTTGCTCCT-3'          |                                     |    |
| <i>Gapdh</i>                            | 5'-GCCTTCCGTGTTCTACC-3'         | 5'-GCCTGCTTACCACCTTC-3'             |                                     |    |
| <i>Mgmt</i>                             | 5'-TGCCTGCTCTCCATCACC-3'        | 5'-CTTCTCATTGCTCCTCCTACTG-3'        |                                     |    |
| <i>Mlh1</i>                             | 5'-TGAGAGGTTCACTACGAG-3'        | 5'-TTCCATCTGAGTAACTTGC-3'           |                                     |    |
| <b>Bisulfite PCR sequencing primers</b> |                                 |                                     |                                     |    |
| <i>CDKN2B</i>                           | 5'-GGTTGGTTTTTATTTGTTAGAG-3'    | 5'-ACCTAACTCAACTTCATTACCCTC-3'      |                                     |    |
| <i>CNR1</i>                             | 5'-AGGGTAGGATAAAGGTTTATTAAT-3'  | 5'-CCCTTCCCAAACCTTCACTAA-3'         |                                     |    |
| <i>MGMT</i>                             | 5'-ATGTTGGGATAGTTCGCGTTTTAGA-3' | 5'-CCAATCCACAATCACTACAAC-3'         |                                     |    |
| <i>MLH1</i>                             | 5'-GTGATAGATTAGGTATAGGGTT-3'    | 5'-AATATCCAACCAATAAAAAACAAAATA-3'   |                                     |    |
| <i>Cnr1</i>                             | 5'-TTAGTGAGTTTTGGTAATGAGTAG-3'  | 5'-TAAACCTTATCCTACCCTAACAAC-3'      |                                     |    |
| <i>Mgmt</i>                             | 5'-AGTGATTGGATTTTTAGTGGTTTA-3'  | 5'-ATTCCTAAAAACAACCTCTTCTCC-3'      |                                     |    |
| <b>MSP primers</b>                      |                                 |                                     |                                     |    |
| <i>CDKN2B</i>                           | U                               | 5'-TGTGATGTGTTTGTATTTGTGGTT-3'      | 5'-CCATACAATAACCAAACAACCAA-3'       | 18 |
|                                         | M                               | 5'-GCGTTCGTATTTGCGGTT-3'            | 5'-CGTACAATAACCGAACGACCGA-3'        |    |
| <i>MLH1</i>                             | U                               | 5'-TTTTGATGTAGATGTTTTATTAGGGTTGT-3' | 5'-ACCACCTCATCATAA CTACCCACA-3'     | 18 |
|                                         | M                               | 5'-ACGTAGACGTTTTATTAGGGTCGC-3'      | 5'-CCTCATCGTAACTACCCGCG-3'          |    |
| <i>Cdkn2b</i>                           | U                               | 5'-GGTTTTTATTTGGTGTGAGTTGT-3'       | 5'-CTCTAAAAACCAATAACTTCAAT-3'       | 17 |
|                                         | M                               | 5'-GTTTTTATTTCGGCGTGAGTC-3'         | 5'-CTCTAAAAACCAATAACTTCGAT-3'       |    |
| <i>Mlh1</i>                             | U                               | 5'-TTTGTGTAGATGTTTGATTAGGGTTGT-3'   | 5'-CCACCTAATCACCTCTACTCAAAAACACA-3' | 16 |
|                                         | M                               | 5'-TCGTAGACGTTTCGATTAGGGTCGC-3'     | 5'-TAATCGCCTCTACTCGAAAACGCG-3'      |    |

## DISCUSSION

Numerous genetic alterations have been reported in CRC, including *APC*, *KRAS*, *TP53*, *BRAF*, *PIK3CA*, and *PTEN*. Some of these mutations are associated with CIMP. For example, the levels of CIMP are associated with microsatellite instability (MSI) and mutations of *KRAS* and *BRAF* in CRC<sup>1,2</sup>. However, conflicting data exists over prognostic implications of CIMP in CRC<sup>3,4</sup>. This discrepancy may be due to the status of microsatellite stability (MSS) and *BRAF* mutations as well as biomarkers used for characterizing CIMP. For example, one report indicated that CRC patients with CIMP<sup>+</sup>/MSS subtype had the worst clinical outcome and that this adverse prognostic effect depended on the presence of a *BRAF* mutation<sup>5</sup>. In contrast, another study reported that CIMP-high patients had shorter cancer-specific survival than CIMP-negative patients in the MSS subgroup and this correlation was lost after adjusting for the *BRAF* mutation<sup>6</sup>, although the *BRAF* V600E mutation is associated with poor survival in CRC patients with MSS<sup>7</sup>. In addition, the *KRAS* mutation was reported to be more significantly associated with CIMP-low CRC than CIMP-high and CIMP-negative CRC after tumors were stratified by MSI status<sup>8</sup>. A subsequent study showed that this subtype of CRC (CIMP-low/*KRAS*-mutation) was correlated with worse prognosis<sup>9</sup>. Another recent study reported that CRC could be characterized into four distinct DNA methylation subgroups, including CIMP-high/*BRAF*-mutation, CIMP-low/*KRAS*-mutation, CIMP-negative/*TP53*-mutation, CIMP-negative/higher frequency of *TP53* mutations, and CIMP-negative/low frequency of *TP53* mutations<sup>10</sup>. Furthermore, RAS was found to affect epigenetic silencing through a pathway that is required for maintenance of a fully transformed phenotype<sup>11</sup>. Since *KRAS* and *BRAF* mutations contribute to CIMP in CRC, it is conceivable that the MAPK pathway could also influence CIMP in CRC. Indeed, a recent study showed that MAPK1 mutations were associated with a CIMP<sup>+</sup> and/or MSI<sup>+</sup> phenotype in CRC<sup>12</sup>. Our previous study showing that PGE<sub>2</sub> stimulated CRC cell proliferation via a RAS-MAPK pathway<sup>13</sup> prompts us to postulate that a RAS-*BRAF*-MAPK pathway may mediate the PGE<sub>2</sub> induction of DNMTs via its PTGER4 (EP4) receptor. Further

investigation is needed to test this hypothesis. Moreover, silencing of tumor suppressor and DNA repair genes by CGI methylation contributes to tumor initiation and progression although it may not directly be associated with poor survival in CRC patients.

## **METHODS**

**Materials and Reagents.** LS-174T and HT-29 cells were purchased from ATCC. HCA7 cells were a generous gift from Susan Kirkland. These cells were maintained in McCoy's 5A medium containing 10% fetal bovine serum in a 5% CO<sub>2</sub> atmosphere and were cultured in serum free condition for 48 h before the treatments. For PGE<sub>2</sub> treatment, cells were treated with PGE<sub>2</sub> at 1 μM for 24 h. For celecoxib/PGE<sub>2</sub> treatment, cells were treated with PGE<sub>2</sub> at 1 μM after pre-treated with celecoxib at 10 μM for 72 h. For PTGER antagonist treatment, cells were pre-treated with 1 μM PTGER antagonist for 0.5 h before PGE<sub>2</sub> treatment (1 μM for 24 h). PGE<sub>2</sub> and CNR1 (CB1) antibody were purchased from Cayman Chemical. DNMT1, DNMT3B, and MLH1 antibodies were purchased from Santa Cruz Biotechnology. ACTB antibody and 5-Aza-dC were purchased from Sigma-Aldrich. MGMT and CDKN2B (p15) antibodies were purchased from Cell Signaling Biotechnology. Celecoxib was obtained from Pfizer.

**Quantitative PCR.** RNA was isolated from cultured cells or mouse colonic tumor epithelial cells using the TRIzol reagent and was reversely transcribed to cDNA using SuperScript III Reverse Transcriptase (Invitrogen). Q-PCR was performed with SYBR Green using the CFX96 Real-time System (Bio-Rad). *ACTB* and *Gpadh* were used as endogenous gene control. Primers used are listed in **Supplementary Table 2**.

**Western blotting.** Western blot analysis was performed as described previously<sup>14</sup>.

**Lentivirus production and stable transfection.** DNMT1 and DNMT3B shRNAs were

purchased from Open Biosystems. Lentivirus production and stable transfection were performed as previously described<sup>15</sup>.

**Mouse experiments.** *Apc*<sup>Min/+</sup> mice were purchased from Jackson Laboratory and were housed and treated in accordance with protocols approved by the Institutional Animal Care and Use Committee at The University of Texas M.D. Anderson Cancer Center. For PGE<sub>2</sub> treatment, male *Apc*<sup>Min/+</sup> mice at age of 4 weeks old were treated with PGE<sub>2</sub> at 100  $\mu$ l of 1.5  $\mu$ g  $\mu$ l<sup>-1</sup> by gavage twice per day for 12 weeks. For combined treatment with PGE<sub>2</sub> and 5-Aza-dC, male *Apc*<sup>Min/+</sup> mice at age of 6 weeks old were treated with vehicle, PGE<sub>2</sub> as described above, or PGE<sub>2</sub> as described above plus 5-Aza-dC (1 mg kg<sup>-1</sup>, IP injection, twice per week) for 8 weeks. For celecoxib and 5-Aza-dC treatment, male *Apc*<sup>Min/+</sup> mice at age of 6 weeks old were treated with vehicle, celecoxib (500 ppm in AIN-76A diet, MP Biomedicals), 5-Aza-dC as described above, or celecoxib plus 5-Aza-dC as described above for 13 weeks. For celecoxib and PGE<sub>2</sub> experiment, male *Apc*<sup>Min/+</sup> mice at age of six weeks old were treated with vehicle, celecoxib, or celecoxib plus PGE<sub>2</sub> as described above for 8 weeks. After the mice were sacrificed, the polyp number and size were counted and measured under a Nikon SMZ1000 dissecting scope using NIS-Elements imaging software.

**Bisulfite PCR sequencing.** Genomic DNA was isolated from cultured cells or mouse colonic tumor epithelial cells using QIAamp DNA Mini Kit (Qiagen). 500  $\mu$ g of DNA was treated with sodium bisulfite using EZ DNA Methylation-Gold Kit (ZYMO Research). The bisulfite-converted DNA was amplified by PCR using Bio-Rad HotStar plus Taq DNA polymerase and primers listed in **Supplementary Table 2**. Cycling conditions were following: denaturation at 95 °C for 5 min, followed by 45 cycles of amplification (95 °C for 30 s, annealing temperature for 30 s, and 72 °C for 45 s), and a final extension at 72 °C for 10 min. The PCR products were run on a 3% agarose gel and recovered from the gel using QIAQuick Gel Extraction Kit (Qiagen). The

purified PCR products were submitted for sequencing (SeqWright) if their concentration was high enough or subjected to second round of PCR for further enrichment. On the chromatograms of sequencing results, the heights of methylated peak (C peak) and unmethylated peak (T peak) of each CpG were measured and the percentage of methylation was calculated as:  $\text{methylation\%} = 100 \times \frac{\text{value of methylated peak}}{\text{value of methylated peak} + \text{value of unmethylated peak}}$ . The overall DNA methylation of a gene promoter region was the average of methylation percentages of all CpGs examined.

**Methylation-Specific PCR.** Methylation-specific PCR (MSP) has been well established for measuring the status of specific CGI methylation of *CDKN2B* and *MLH1* genes in human CRC<sup>16-18</sup>. MSP analysis of bisulfite-converted DNA was performed using methylated (M) and unmethylated (U) primer sets listed in **Supplementary Table 2**. The cycling conditions were the same as for Bisulfite PCR Sequencing above. The PCR products were run on a 3% agarose gel and recovered with QIAQuick Gel Extraction Kit (Qiagen) after pictures were taken. The purified PCR products were submitted for sequencing (SeqWright) to confirm the methylation status of the amplified CpGs.

**PGE<sub>2</sub> measurement.** Tissues were homogenized in PBS with 10% 2,6-di-*tert*-butyl-*p*-cresol. PGE<sub>2</sub> level was measured using mass spectrometry and normalized with protein concentration.

**Statistical analysis.** The association studies with the human tumor and normal tissues were analyzed with nonparametric Spearman correlation analysis. The data generated from mouse experiments were analyzed with Wilcoxon Rank Sum test. The data generated from Q-PCR experiments were analyzed with two-tailed unpaired Student's *t* test.  $P < 0.05$  was considered statistically significant.

## REFERENCE

1. Shen, L., *et al.* *Proc Natl Acad Sci U S A* **104**, 18654-18659 (2007).
2. Barault, L., *et al.* *Cancer Res* **68**, 8541-8546 (2008).
3. Shen, L., *et al.* *Clin Cancer Res* **13**, 6093-6098 (2007).
4. Ogino, S., *et al.* *Gut* **58**, 90-96 (2009).
5. Kim, J.H., Shin, S.H., Kwon, H.J., Cho, N.Y. & Kang, G.H. *Virchows Arch* **455**, 485-494 (2009).
6. Dahlin, A.M., *et al.* *Clin Cancer Res* **16**, 1845-1855 (2010).
7. Samowitz, W.S., *et al.* *Cancer Res* **65**, 6063-6069 (2005).
8. Ogino, S., Kawasaki, T., Kirkner, G.J., Loda, M. & Fuchs, C.S. *J Mol Diagn* **8**, 582-588 (2006).
9. Yagi, K., *et al.* *Clin Cancer Res* **16**, 21-33 (2010).
10. Hinoue, T., *et al.* *Genome Res* (2010).
11. Gazin, C., Wajapeyee, N., Gobeil, S., Virbasius, C.M. & Green, M.R. *Nature* **449**, 1073-1077 (2007).
12. Slattery, M.L., *et al.* *Carcinogenesis* **32**, 318-326 (2011).
13. Wang, D., Buchanan, F.G., Wang, H., Dey, S.K. & DuBois, R.N. *Cancer Res* **65**, 1822-1829 (2005).
14. Xia, D., *et al.* *J Biol Chem* **282**, 3507-3519 (2007).
15. Xia, D., Holla, V.R., Wang, D., Menter, D.G. & DuBois, R.N. *Cancer Res* **70**, 824-831 (2010).
16. Borinstein, S.C., *et al.* *Mol Carcinog* **49**, 94-103.
17. Wolff, L., *et al.* *Oncogene* **22**, 9265-9274 (2003).
18. Xu, X.L., *et al.* *World J Gastroenterol* **10**, 3441-3454 (2004).
